# Supplementary material for: Differential gene expression and Hog1 interaction with osmoresponsive genes in the extremely halotolerant black yeast Hortaea werneckii
Source: PubMed Central journal article supplement (PMC2034391; doi:10.1186/1471-2164-8-280), 2007-08-16
Supplement: 1471-2164-8-280-S1.pdf [file 1471-2164-8-280-S1.pdf]

**Additional file 1: Primers list.** Gene names, sequences and sizes of corresponding PCR products (cDNA based) obtained with primers for RT-PCR and ChIP-PCR analyses.

| Gene name      | Forward primer [5'→3']      | Reverse primer [5'→3'] | Product size [bp] |
|----------------|-----------------------------|------------------------|-------------------|
| <i>Hw26SRR</i> | CATCACTGTACTTGTTCGCTATCGGTG | GTAACGGCGAGTGAAGCGGC   | 279               |
| <i>HwAGP1</i>  | GCGGTAATGACCACGAAGTT        | TCAAGGCCTTCGGTGAACATA  | 451               |
| <i>HwATP1</i>  | CTGAGGTCTCCTCCATCCTC        | GAGGTACGCTTGACGGTCTC   | 259               |
| <i>HwATP2</i>  | GTCAGACCAGTCAGGGCAAC        | CCGTGTTCAATCAGGAGCTT   | 223               |
| <i>HwATP3</i>  | GTTCTTGGAGGCGTTGTCC         | GATCTCCCTCACCTTCACCA   | 343               |
| <i>HwBMH1</i>  | GGCCTGGTCCTCAACTTCTC        | GCTCTCCTCAGACAGGGTGT   | 126               |
| <i>HwCDC3</i>  | CAACGTTATGGTCGTTGGTG        | AGAGTGTCGGACTTCGCAAT   | 450               |
| <i>HwCIT1</i>  | CGTAGGCCTTGAGAAAGCTA        | CCTCGACTCTGAGGAGGGTA   | 305               |
| <i>HwCOB1</i>  | AATTTGCTACAAATGCAAAAAGG     | GCAGGTTCTGGAAATCCTTTAG | 387               |
| <i>HwCOX1</i>  | TCAGGATGACCGAAAAATCA        | CCGCTTTCAGGAATTCAAAAG  | 335               |
| <i>HwCYT1</i>  | GTCTACCGCGAAGTCTGCTC        | TCCTCGGGATAACCAGTCAG   | 317               |
| <i>HwDBP2</i>  | CTTCCGGATCCAGTCTCAG         | CGCGAAAAACCAGATGACC    | 201               |
| <i>HwECM33</i> | CCCTTAATGACACCGCTTCT        | TCGGTGGTGACCTCTCTTTC   | 295               |
| <i>HwEFT2</i>  | GGAGATGGCAGGTGAAGAAT        | AGCTTGAGCGTGCTTTTCAAC  | 232               |
| <i>HwELF1</i>  | AGACTCCAAGCCCATCTTTG        | ACAAGAAACCGACCTCATCC   | 247               |
| <i>HwERV25</i> | AGAAGCTGAAGCCCATGGAA        | CGGAAGTACGCCCTCAAATA   | 190               |
| <i>HwFAS1</i>  | CCTCCGATCCGTCAGATG          | TAGAGGCATCGGAAACCTTG   | 224               |
| <i>HwFRE7</i>  | GCTTTGGCTTCCAGAATGTC        | AGCTTGATTTCGGAGGTTTTG  | 217               |
| <i>HwFUN12</i> | GACTTCCTTAGCTCCCGTGAC       | AAGGTTGACAAGGATGCACA   | 294               |
| <i>HwGDH1</i>  | CCTCGAAGATGTCGATAGCC        | AGGAGTCCTTCAAGGGCAAG   | 426               |
| <i>HwGND2</i>  | GAAGCAGAGACGTTACCACCA       | CTCCAGAAGCCGGAGATTG    | 401               |
| <i>HwGPD1A</i> | CGAGTCCTTACCAGAGGATCCT      | ACGGCAGGCCAAAAAGAAAAG  | 336               |
| <i>HwGUT2</i>  | CTGCCATGGAAGGAAGAAGA        | CCCATGCTCAAGAAGGAGAA   | 435               |
| <i>HwHTA1</i>  | TACCTGGCTGCTGAGATCCT        | GTGAATGTTGGGGAGGACAC   | 168               |
| <i>HwHSC82</i> | TCTTGAGGGACTTGGTCAGG        | AGGACAAGGAGCAGTTCGAC   | 441               |
| <i>HwIRE1</i>  | TCCGGTACTTCTGCCAGCAA        | TCGTAGGGGTGGATACCATC   | 571               |
| <i>HwKAR2</i>  | AAGAAGGCCAGCAAGGGTAT        | GGTGATGGTGATGGACTCG    | 494               |
| <i>HwKGD2</i>  | TCAATGCTGGCATTACAG          | GATGAACCGTATGCGTCTGA   | 231               |
| <i>HwLSC2</i>  | GATCTTGAGGCCACTGTCTG        | CGTCAGGAGGAGGTCTTCAG   | 432               |
| <i>HwMDH1</i>  | CGTCTCTGAGCTCGCTCTTT        | GACACCCCTGGACTTGAAGA   | 337               |
| <i>HwMET14</i> | CTTACCCGTCAGGAGCGTAG        | AGTCGGTGTTCTTGGTGTCC   | 346               |
| <i>HwMET17</i> | GACATGCCGAGAGATTGGAT        | AGGCAGCGGTAGACCATCT    | 409               |
| <i>HwMET6</i>  | TCAAGGACTGGTTCGCTTTC        | GGGACTGCATGCTCTTGG     | 126               |
| <i>HwMIR1</i>  | GCTGTCTGCTGTTCCATCAC        | TACCTTCGTTTTGGCCATCT   | 422               |
| <i>HwNHP6A</i> | GAGAAAGAAGGACCCCAACA        | GAGCCTTCTGCTTGTCTGTT   | 167               |
| <i>HwNUC1</i>  | CGCCACCTAACGTAGCAGTT        | ATCGTCTTCTGCCTCTCCTG   | 280               |
| <i>HwOPI3</i>  | GGTCAAGACGAGGATGTTGC        | ACGTTCTGGAATACCGTTGC   | 243               |
| <i>HwPDI1</i>  | TGGTTGGTTTTCTTCGGAAAG       | TTGATCTTGCCCTTCTGCTT   | 388               |
| <i>HwPGK1</i>  | CATACTTGATCGTGGGCAGA        | GCTTGCGGATACCAACACAT   | 188               |
| <i>HwPMA2</i>  | TACCGCCAACCAGCTCTCTA        | CTTGAGACAGGGTCGAAAG    | 223               |
| <i>HwPRY1</i>  | GCGTTGACCTCAGCATTGTA        | CCTACGCGGACAGAGTTTTG   | 250               |
| <i>HwPUF1</i>  | GACGTAGTTGGCGAAGGAGT        | CTGCAGAAGGGCAGACTTGT   | 300               |
| <i>HwRAD16</i> | GCTCTTCTGCTGGCTTTGAT        | CTCAACTTCGGTGACAAGCA   | 324               |
| <i>HwRPN2</i>  | GAGAACGAAAACGCTCAGGA        | GTTGCCACGATGAATGACAC   | 411               |
| <i>HwSAM2</i>  | GCAACACCTTCCTTTTACC         | GCCTCCTCATAGTGCAGACC   | 334               |
| <i>HwSHY1</i>  | CGAGGGCAATCCAACAAC          | GAATTTCCCCCTCGCGTAT    | 303               |
| <i>HwSKN1</i>  | AGCGAAAACAGAGACCTCGAA       | CCATTTTCGACAAGGTTCAAGA | 120               |
| <i>HwSSA4</i>  | GCAACACCTTCCTTTTACC         | GCCTCCTCATAGTGCAGACC   | 334               |
| <i>HwSTT3</i>  | TCACCGTCTCTGGCGTTG          | GTCTGGCAAAGCAGAGAAC    | 446               |
| <i>HwSUN4</i>  | GCAGGTGAGGTTGCTGGT          | GGCTCATACTGCTCCTACGC   | 294               |
| <i>HwTDH1</i>  | CCAGCAGTGTGGTGAAAGA         | ATCATCCTCTGCTCCGTTCC   | 165               |
| <i>HwTEF1</i>  | CAGCGTACCAGACTTGATG         | AGTGAAGTCCGTCGAGATGC   | 335               |
| <i>HwTIF1</i>  | AAGACCGCTACCTTCGCTATC       | GTGACCTCAAGCACATCCTG   | 426               |

|                |                          |                         |     |
|----------------|--------------------------|-------------------------|-----|
| <i>HwTKL1</i>  | ATGGAAATTCCGTTGTCGTC     | TTCTCCACCTGTTCGGCTAC    | 346 |
| <i>HwTOM40</i> | CGGCACCAATAACATCCTCT     | CTCCACCTTGTCGGTCAACT    | 451 |
| <i>HwTUB2</i>  | TAGCTCGGGTTGTTTCAGCTT    | CCGTATGATGGCCACTTTCT    | 183 |
| <i>HwUGP1</i>  | TGATGGTCAAGTGGTCAAGC     | GAGGCGGACCTGAGCATC      | 301 |
| <i>SOL11</i>   | CTACAGCGAGGACATCACCA     | CTGCAGCTTCACCTGTTCTG    | 319 |
| <i>SOL13</i>   | CTGCCAGATAACGACGAGGT     | GACACCACCCACGACATCTA    | 252 |
| <i>SOL15</i>   | CTTGCTGACAGCCCAAGAG      | ACTGCCAACGCGGCTTAC      | 228 |
| <i>SOL16</i>   | GGGCTCATGGAGAACAGAAA     | GACGGTCTAATCCCAGCTCA    | 303 |
| <i>SOL17</i>   | GTTGTGGACGATGTTGTTGC     | ACAGCTCCTTCGACATCACC    | 365 |
| <i>SOL18</i>   | CATTACTCTGACCCGCACCT     | CCAGCAGTGTTGGTGAAAGA    | 390 |
| <i>SOL19</i>   | CCGTAGCACTCGGGTAGACA     | CTGGTTTGACGACGGGTACT    | 264 |
| <i>SOL20</i>   | CCAGCAGTGTTGGTGAAAGA     | GATCATCCTCTGCTCCGTTT    | 166 |
| <i>SOL21</i>   | TCATCAGCTCGTTGATTTTCG    | ATCTACGCAACCGCTACACC    | 204 |
| <i>SOL23</i>   | ACAGCGATTAGATCGGCAAA     | GCCCCGTTTCCGATAGAGC     | 238 |
| <i>SOL24</i>   | CAACACGCTGTCACCTGTCT     | CATCCTCTTCAGTGGCTTCC    | 209 |
| <i>SOL25</i>   | CGACATGTTGTCGATATCTGCT   | TTGATGACCATTAATCAACCACT | 204 |
| <i>SOL26</i>   | GCCAAGGGCATTGAGTAAAA     | GCCCTCCATATCTCGTTTCC    | 204 |
| <i>SOL27</i>   | CACTGTCTGCAACTACTACGAAGC | CGGCCGAGGTACATTGTTAT    | 350 |
| <i>SOL28</i>   | GACCGTGAGCTCAATCCTGT     | GACCCTGTGCTTCAGAGACC    | 232 |

---
